# Supplementary material for: Antibiotic Prescribing Practices in Endodontic Infections: A Survey of Dentists in Serbia
Source: Antibiotics (Basel). 2021 Jan 12;10(1):67. doi: 10.3390/antibiotics10010067 (PMC7827796; doi:10.3390/antibiotics10010067)
Supplement: Supplementary file 1 [file antibiotics-10-00067-s001.pdf]

## File S1. Questionnaire

### Antibiotic prescription in endodontic infections - questionnaire

1. Gender: ☐ Male ☐ Female
2. Age (yrs): ☐ 25–35 ☐ 36–45 ☐ 46–55 ☐ 56–65
3. Academic degree: ☐ doctor of dentistry ☐ master of endodontics ☐ master in other branch of dentistry
4. Which antibiotic do you prescribe most often for an adult patient with no medical allergies?
  - Amoxicillin (Amoksicilin®, Ospamox®, Sinacillin®): ☐ 250 mg ☐ 500 mg ☐ 1000 mg
  - Amoxicillin+Clavulanic acid (Amoksiklav®, Augmentin®, Betaklav®, Klavobel®, Panklav®):  
☐ 500+125 mg ☐ 875+125 mg ☐ 1000+62.5 mg
  - Clindamycin (Clindamycin MIP®): ☐ 300 mg ☐ 600 mg
  - Azithromycin (Azitromicin®, Sumamed®, Hemomycin®, Azibiot®): ☐ 250 mg ☐ 500 mg
  - Metronidazole (Orvagyl®): ☐ 250 mg ☐ 400 mg
  - Other: \_\_\_\_\_
5. When you prescribe antibiotics, how long is the duration of treatment:
  - ☐ 3 days
  - ☐ 5 days
  - ☐ 7 days
  - ☐ 10 days
  - ☐ until symptoms disappear
6. Which antibiotic do you prescribe most often for an adult patient with no allergies to penicillin?
  - ☐ Clindamycin (Clindamycin MIP®)
  - ☐ Azithromycin (Azitromicin®, Sumamed®, Hemomycin®, Azibiot®)
  - ☐ Metronidazole (Orvagyl®)
  - ☐ Erythromycin (Eritromicin HF®)
  - ☐ Tetracycline (Amracin®)
  - ☐ Other: \_\_\_\_\_
7. In which situations do you prescribe antibiotics (more than one answer is allowed):
  - ☐ irreversible pulpitis (pain, no other symptoms of infection)
  - ☐ pulp necrosis (non-vital teeth, widening of periodontal space)
  - ☐ acute apical periodontitis (pain, pain to percussion, widening of periodontal space)
  - ☐ chronic apical abscess (widening of periodontal space, teeth with sinus tract)
  - ☐ acute apical abscess with no systemic involvement (localized fluctuant swellings)
  - ☐ acute apical abscess in medically compromised patients (localized fluctuant swellings, patient with systemic disease causing impaired immunologic function)
  - ☐ acute apical abscess with systemic involvement (localized fluctuant swellings, elevated body temperature >38 °C, malaise, lymphadenopathy, trismus)
  - ☐ progressive infections (rapid onset of severe infection/within 24 h, cellulitis)
  - ☐ persistent infections (osteomyelitis, chronic exudation)
  - ☐ post-operative pain
  - ☐ always during endodontic treatment
  - ☐ perforation

Thank you for your collaboration!
